# Supplementary material for: Traumatic axonal injury in the mouse is accompanied by a dynamic inflammatory response, astroglial reactivity and complex behavioral changes
Source: Springer Nature journal article supplement (doi:10.1186/1742-2094-10-44), 2013-04-04
Supplement: 12974_2012_1137_MOESM8_ESM.pdf [file 12974_2012_1137_MOESM8_ESM.pdf]

Trial 1 CCI and cFPI (PCA-X)

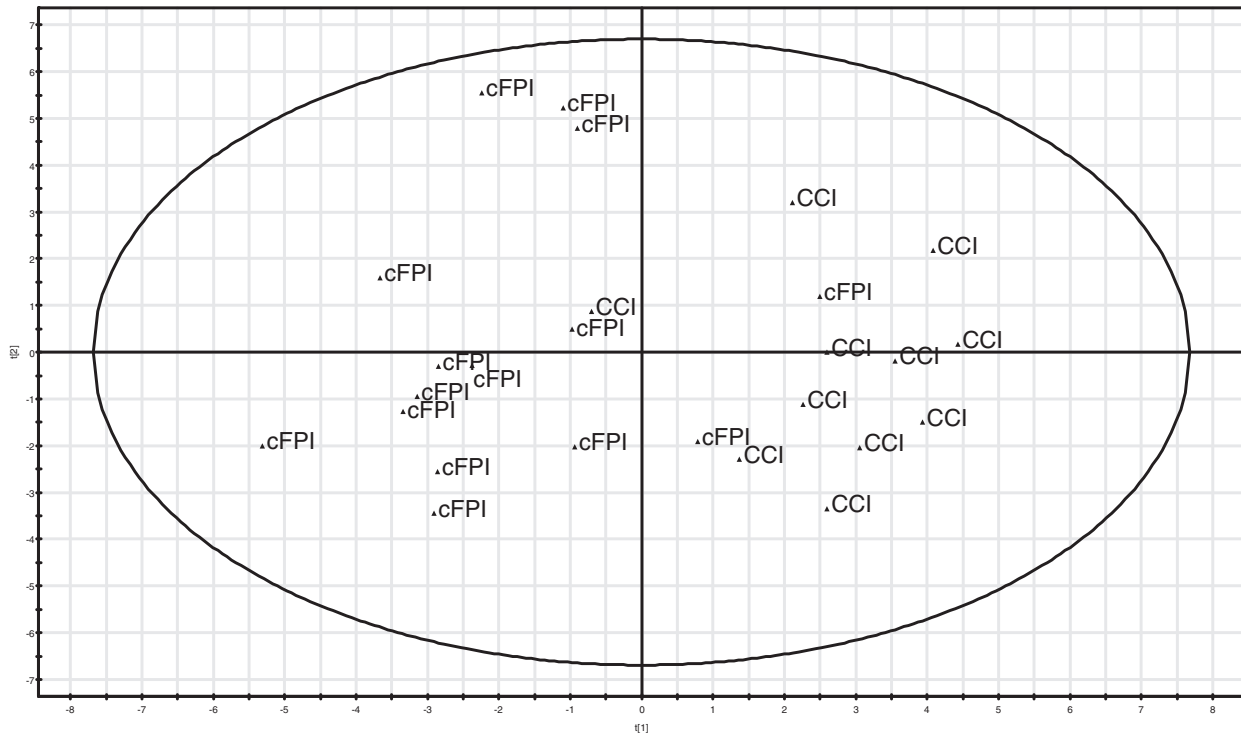

R2X [1] = 0,213971

R2X [2] = 0,162515

Ellipse: Hotelling T2 (0,95)

SIMCA-P+ 12.0.1 - 2012-06-05 12:02:58 (UTC+1)

Trial 1 CCI and cFPI (PCA-X)

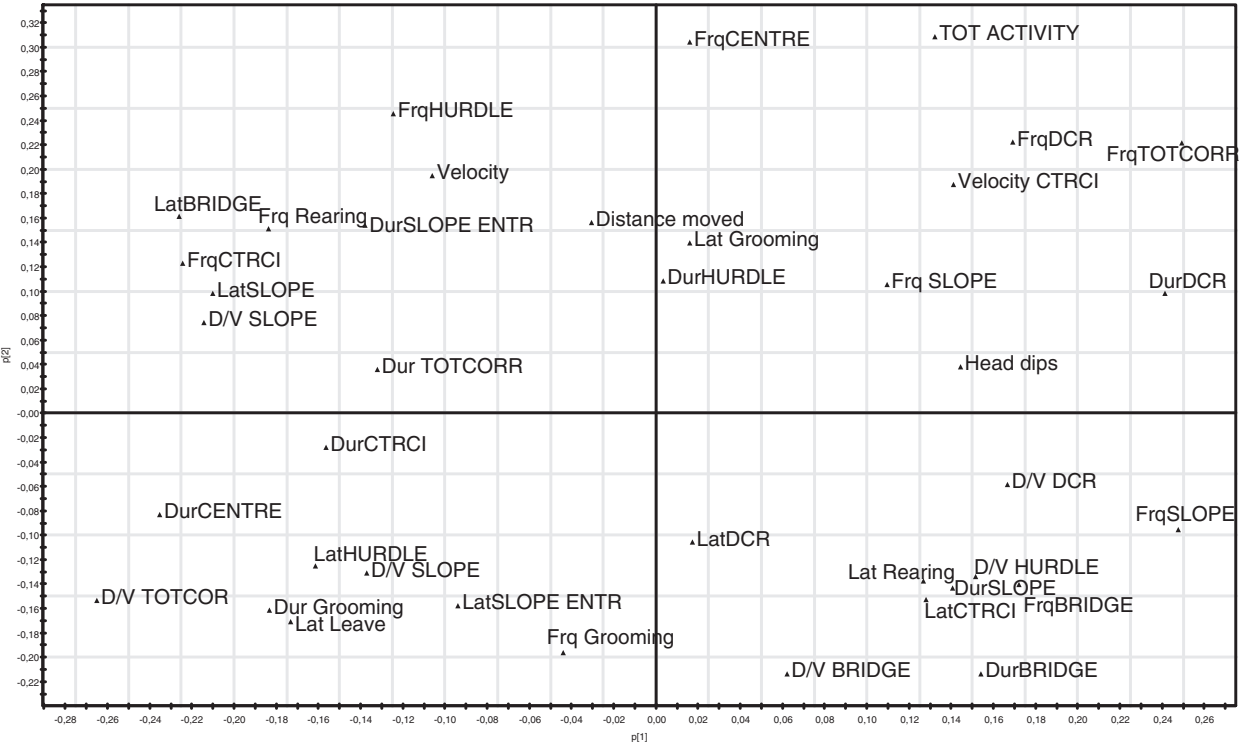

R2X [1] = 0,213971 R2X [2] = 0,162515

SIMCA-P+ 12.0.1 - 2012-06-05 12:02:26 (UTC+1)
