# Supplementary material for: Traumatic axonal injury in the mouse is accompanied by a dynamic inflammatory response, astroglial reactivity and complex behavioral changes
Source: Springer Nature journal article supplement (doi:10.1186/1742-2094-10-44), 2013-04-04

Trial 2 CCI and cFPI (PCA-X)

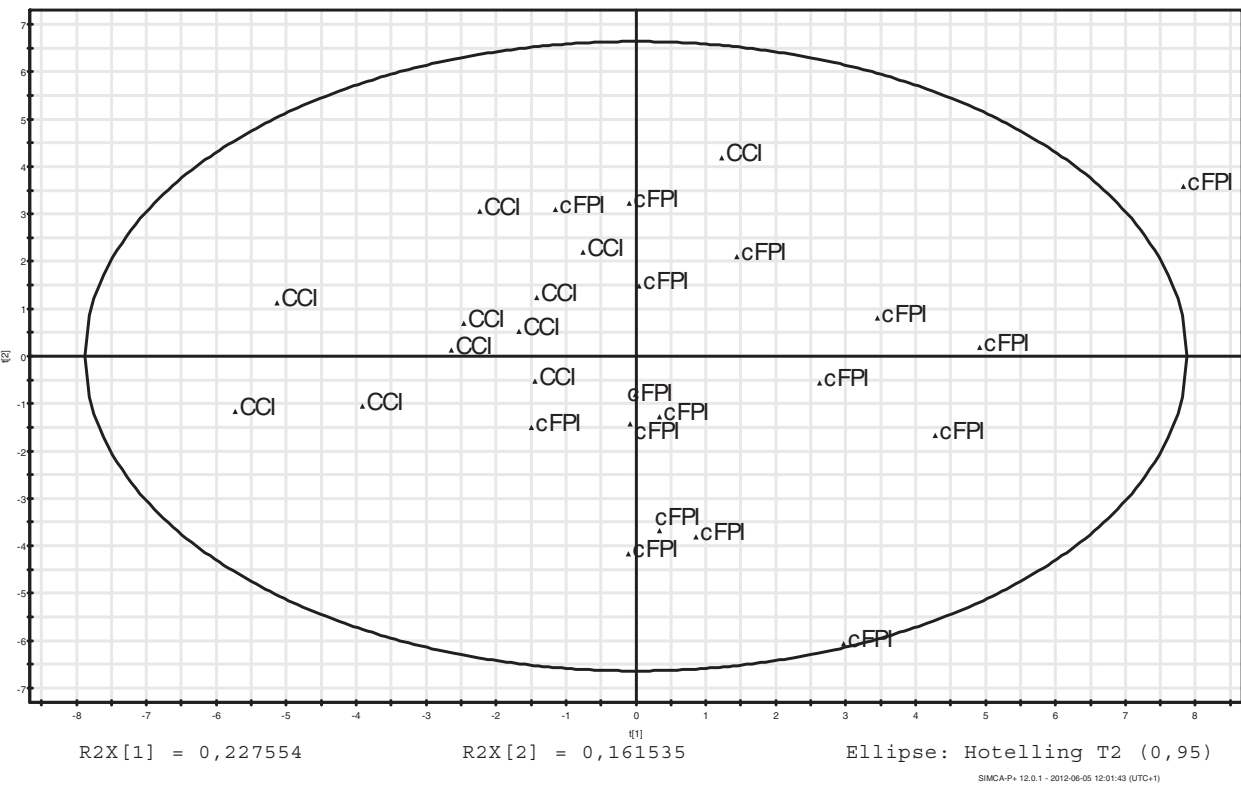

Trial 2 CCI and cFPI (PCA-X)

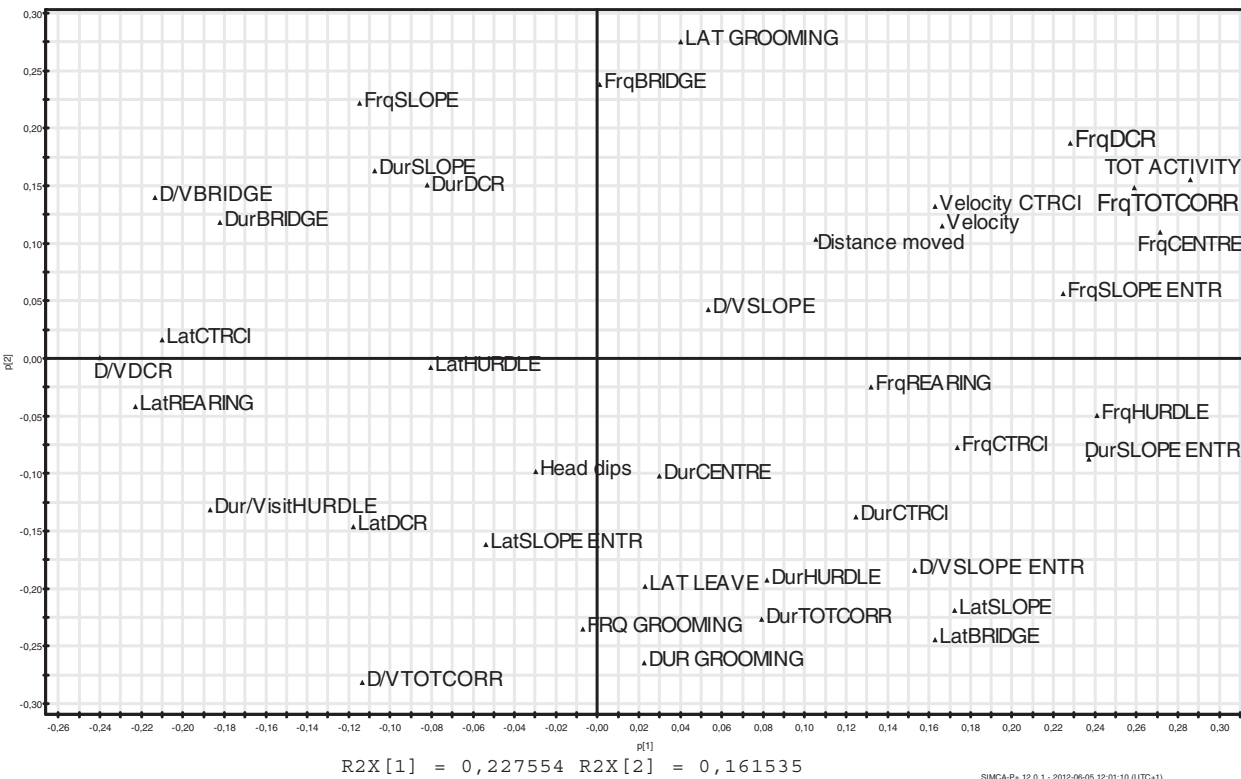

Supplement: 12974_2012_1137_MOESM9_ESM.pdf [file 12974_2012_1137_MOESM9_ESM.pdf]
